# Supplementary material for: Mechanosensitive control of mitotic entry
Source: bioRxiv or medRxiv preprint supplement (doi:10.1101/2021.09.23.461473), 2022-03-02
Supplement: Supplementary file [file media-1.pdf]

**a**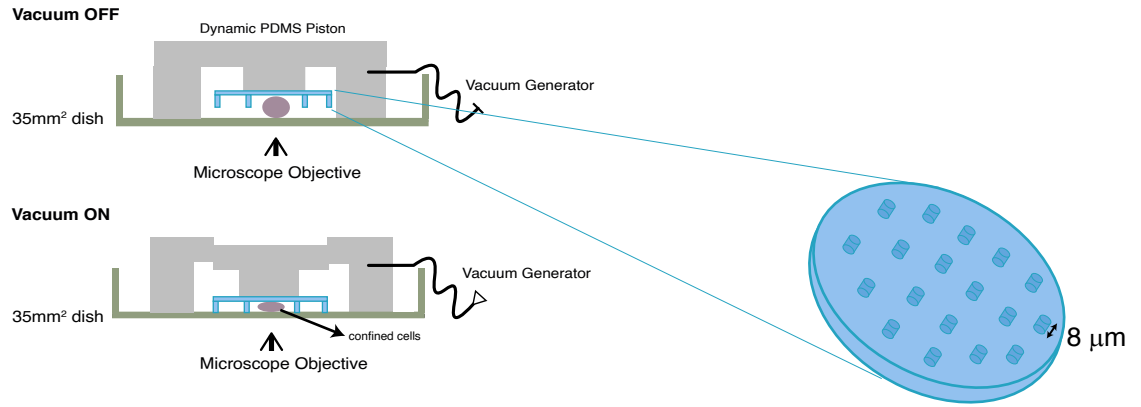**b**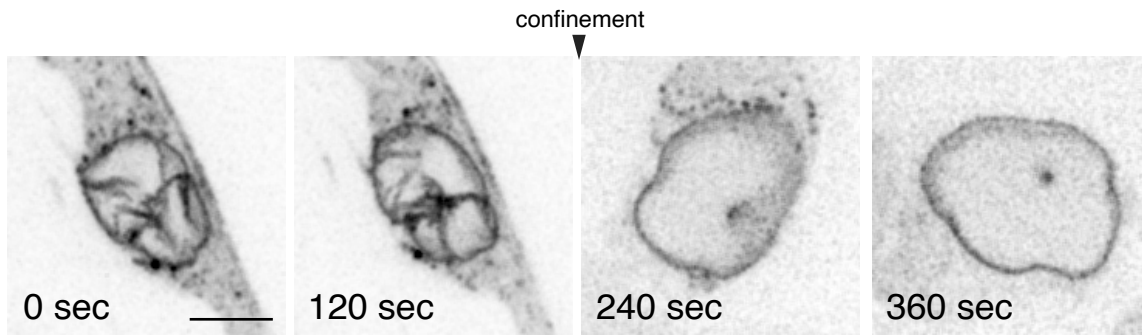

RPE-1 Lap2β-mRFP

**c**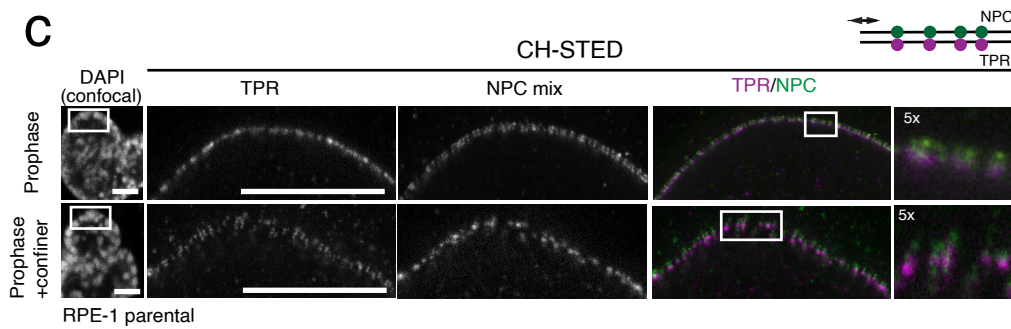**d**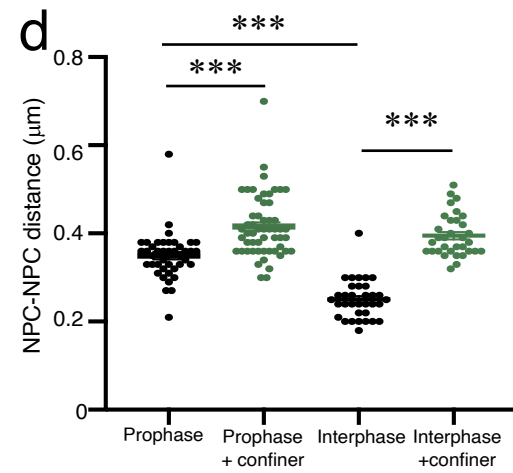**e**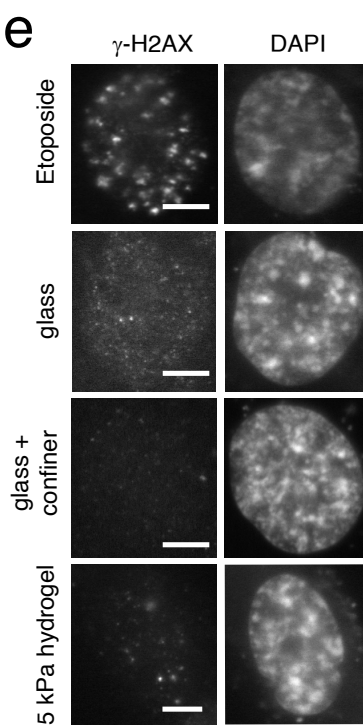**f**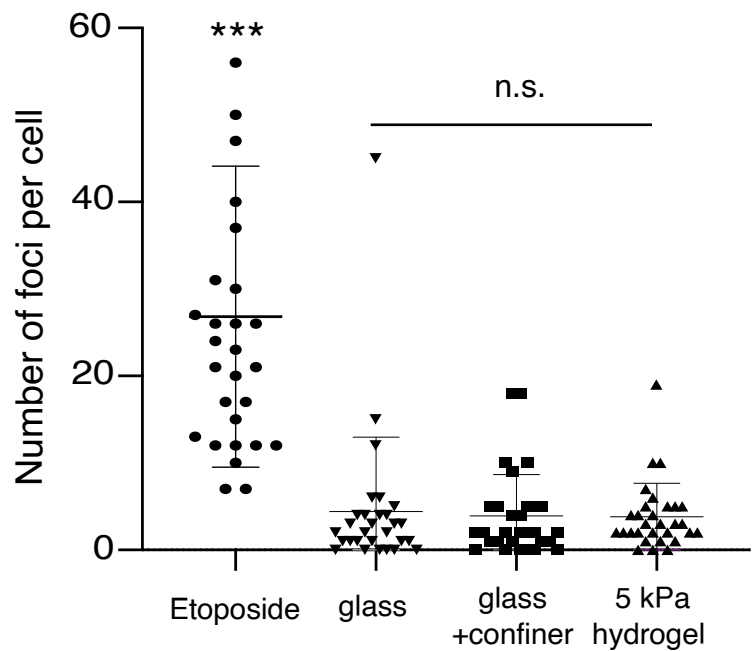

Supplementary Figure 1
