# Supplementary material for: Mechanosensitive control of mitotic entry
Source: bioRxiv or medRxiv preprint supplement (doi:10.1101/2021.09.23.461473), 2022-03-02
Supplement: Supplementary file [file media-3.pdf]

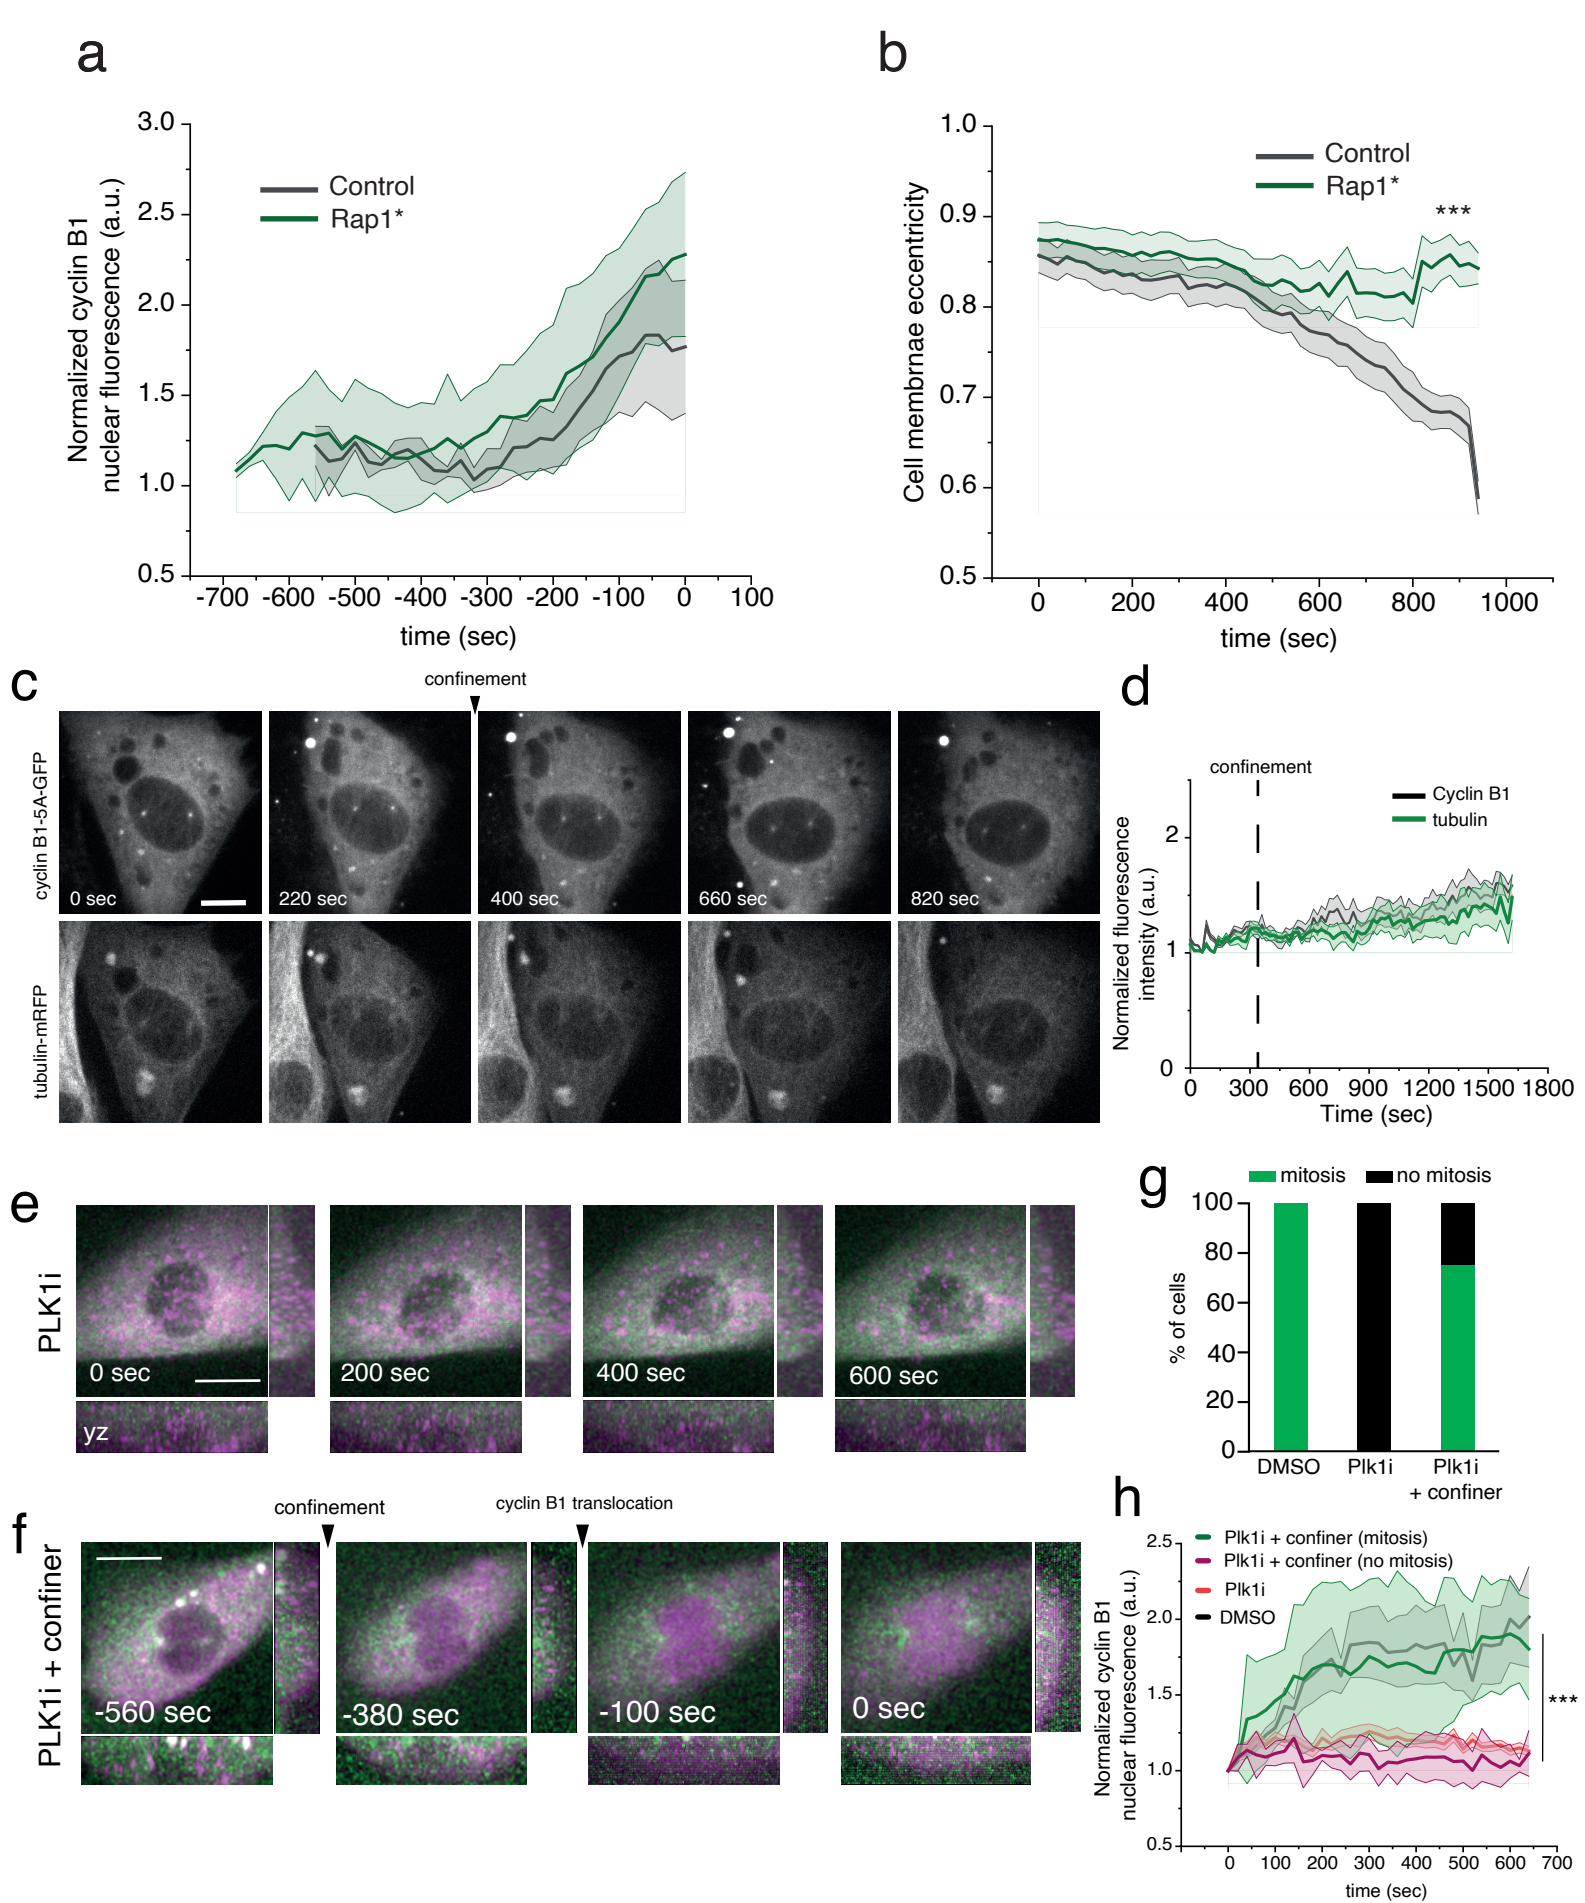

Supplementary Figure 3
